# Supplementary material for: Neuroimaging Findings in Patients with COVID-19: A Systematic Review and Meta-Analysis
Source: PubMed Central journal article supplement — Korean J Radiol. 2021 Jul 1;22(11):1875–85. doi: 10.3348/kjr.2021.0127 (PMC8546134; doi:10.3348/kjr.2021.0127), 2021-07-01
Supplement: kjr-22-1875-s001.pdf [file kjr-22-1875-s001.pdf]

## SUPPLEMENT

**Supplementary Table 1. Quality Assessment of the 17 Included Studies**

| Study                          | NIH Quality Assessment Tool for Case Series Studies Criteria Met |    |    |    |    |    |    |    |    | Quality Rating |
|--------------------------------|------------------------------------------------------------------|----|----|----|----|----|----|----|----|----------------|
|                                | Q1                                                               | Q2 | Q3 | Q4 | Q5 | Q6 | Q7 | Q8 | Q9 |                |
| Abenza-Abildúa et al. [1]      | V                                                                | V  | V  | NA | V  | V  | V  | X  | V  | Good           |
| Agarwal et al. [2]             | V                                                                | X  | NR | NA | V  | V  | V  | V  | V  | Fair           |
| Chougar et al. [3]             | V                                                                | V  | V  | NA | V  | V  | V  | V  | V  | Good           |
| Eliezer et al. [4]             | V                                                                | V  | NR | NA | V  | V  | V  | V  | V  | Good           |
| Freeman et al. [5]             | V                                                                | V  | V  | NA | V  | V  | V  | X  | V  | Good           |
| Grewal et al. [6]              | V                                                                | V  | V  | NA | V  | V  | V  | V  | V  | Good           |
| Hernández-Fernández et al. [7] | V                                                                | V  | V  | NA | V  | V  | V  | V  | V  | Good           |
| Kandemirli et al. [8]          | V                                                                | V  | NR | NA | V  | V  | V  | V  | V  | Fair           |
| Klironomos et al. [9]          | V                                                                | V  | V  | NA | V  | V  | V  | X  | V  | Good           |
| Kremer et al. [10]             | V                                                                | V  | NR | NA | V  | V  | V  | V  | V  | Good           |
| Lin et al. [11]                | V                                                                | V  | V  | NA | V  | V  | V  | X  | V  | Good           |
| Nawabi et al. [12]             | V                                                                | V  | V  | NA | V  | V  | V  | V  | V  | Good           |
| Paterson et al. [13]           | V                                                                | V  | NR | NA | V  | V  | V  | X  | V  | Fair           |
| Radmanesh et al. [14]          | V                                                                | V  | NR | NA | V  | V  | V  | X  | V  | Fair           |
| Radmanesh et al. [15]          | V                                                                | V  | V  | NA | V  | V  | V  | V  | V  | Good           |
| Scullen et al. [16]            | V                                                                | V  | NR | NA | V  | X  | V  | X  | X  | Fair           |
| Yoon et al. [17]               | V                                                                | V  | NR | NA | V  | V  | V  | V  | V  | Good           |

Fair = met 4–6 criteria, Good = met 7–9 criteria, NA = not applicable, NIH = National Institutes of Health, NR = not reported, Poor = met 0–3 criteria, Q1 = was the study question or objective clearly stated?, Q2 = was the study population clearly and fully described, including a case definition?, Q3 = were the cases consecutive?, Q4 = were the subjects comparable?, Q5 = was the intervention clearly described?, Q6 = were the outcome measures clearly defined, valid, reliable, and implemented consistently across all study participants?, Q7 = was the length of follow-up adequate?, Q8 = were the statistical methods well-described?, Q9 = were the results well-described?

## REFERENCES

1. Abenza-Abildúa MJ, Ramírez-Prieto MT, Moreno-Zabaleta R, Arenas-Valls N, Salvador-Maya MA, Algarra-Lucas C, et al. Neurological complications in critical patients with COVID-19. *Neurologia* 2020;35:621-627
2. Agarwal S, Jain R, Dogra S, Krieger P, Lewis A, Nguyen V, et al. Cerebral microbleeds and leukoencephalopathy in critically ill patients with COVID-19. *Stroke* 2020;51:2649-2655
3. Chougar L, Shor N, Weiss N, Galanaud D, Leclercq D, Mathon B, et al. Retrospective observational study of brain MRI findings in patients with acute SARS-CoV-2 infection and neurologic manifestations. *Radiology* 2020;297:E313-E323
4. Eliezer M, Hamel AL, Houdart E, Herman P, Housset J, Jourdaine C, et al. Loss of smell in patients with COVID-19: MRI data reveal a transient edema of the olfactory clefts. *Neurology* 2020;95:e3145-e3152
5. Freeman CW, Masur J, Hassankhani A, Wolf RL, Levine JM, Mohan S. Coronavirus disease (COVID-19)-related disseminated leukoencephalopathy: a retrospective study of findings on brain MRI. *AJR Am J Roentgenol* 2021;216:1046-1047
6. Grewal P, Pinna P, Hall JP, Dafer RM, Tavarez T, Pellack DR, et al. Acute ischemic stroke and COVID-19: experience from a comprehensive stroke center in Midwest US. *Front Neurol* 2020;11:910
7. Hernández-Fernández F, Sandoval Valencia H, Barbella-Aponte RA, Collado-Jiménez R, Ayo-Martín Ó, Barrena C, et al. Cerebrovascular disease in patients with COVID-19: neuroimaging, histological and clinical description. *Brain* 2020;143:3089-3103
8. Kandemirli SG, Dogan L, Sarikaya ZT, Kara S, Akinci C, Kaya D, et al. Brain MRI findings in patients in the intensive care unit with COVID-19 infection. *Radiology* 2020;297:E232-E235
9. Klironomos S, Tzortzakakis A, Kits A, Öhberg C, Kollia E, Ahoromazdae A, et al. Nervous system involvement in coronavirus disease 2019: results from a retrospective consecutive neuroimaging cohort. *Radiology* 2020;297:E324-E334
10. Kremer S, Lersy F, Anheim M, Merdji H, Schenck M, Oesterlé H, et al. Neurologic and neuroimaging findings in patients with COVID-19: a retrospective multicenter study. *Neurology* 2020;95:e1868-e1882
11. Lin E, Lantos JE, Strauss SB, Phillips CD, Campion TR Jr, Navi BB, et al. Brain imaging of patients with COVID-19: findings at an academic institution during the height of the outbreak in New York City. *AJNR Am J Neuroradiol* 2020;41:2001-2008
12. Nawabi J, Morotti A, Wildgruber M, Boulouis G, Kraehling H, Schlunk F, et al. Clinical and imaging characteristics in patients with SARS-CoV-2 infection and acute intracranial hemorrhage. *J Clin Med* 2020;9:2543
13. Paterson RW, Brown RL, Benjamin L, Nortley R, Wiethoff S, Bharucha T, et al. The emerging spectrum of COVID-19 neurology: clinical, radiological and laboratory findings. *Brain* 2020;143:3104-3120
14. Radmanesh A, Derman A, Lui YW, Raz E, Loh JP, Hagiwara M, et al. COVID-19-associated diffuse leukoencephalopathy and microhemorrhages. *Radiology* 2020;297:E223-E227
15. Radmanesh A, Raz E, Zan E, Derman A, Kamintzky M. Brain imaging use and findings in COVID-19: a single academic center experience in the epicenter of disease in the United States. *AJNR Am J Neuroradiol* 2020;41:1179-1183
16. Scullen T, Keen J, Mathkour M, Dumont AS, Kahn L. Coronavirus 2019 (COVID-19)-associated encephalopathies and cerebrovascular disease: the new Orleans experience. *World Neurosurg* 2020;141:e437-e446
17. Yoon BC, Buch K, Lang M, Applewhite BP, Li MD, Mehan WA Jr, et al. Clinical and neuroimaging correlation in patients with COVID-19. *AJNR Am J Neuroradiol* 2020;41:1791-1796
