# Supplementary material for: Neuroimaging Findings in Patients with COVID-19: A Systematic Review and Meta-Analysis
Source: PubMed Central journal article supplement — Korean J Radiol. 2021 Jul 1;22(11):1875–85. doi: 10.3348/kjr.2021.0127 (PMC8546134; doi:10.3348/kjr.2021.0127), 2021-07-01
Supplement: kjr-22-1875-s002.pdf [file kjr-22-1875-s002.pdf]

**Supplementary Table 2. Results of Subgroup Analysis of Critically Ill Patients**

| Outcomes                                                                            | Studies Including Only Critically Ill Patients |                |                                   | Other Studies  |                |                                   | <i>P</i> |
|-------------------------------------------------------------------------------------|------------------------------------------------|----------------|-----------------------------------|----------------|----------------|-----------------------------------|----------|
|                                                                                     | No. of Studies                                 | Proportion (%) | Meta-Analytic Proportion (95% CI) | No. of Studies | Proportion (%) | Meta-Analytic Proportion (95% CI) |          |
| <b>Cohort-based outcomes</b>                                                        |                                                |                |                                   |                |                |                                   |          |
| Patients with neurologic symptoms/all patients                                      | 3                                              | 107/365 (29)   | 35.9 (18.8–57.4)                  | 1              | 308/1176 (26)  | -                                 | 0.601    |
| Patients with neuroimaging/patients with neurologic symptoms                        | 3                                              | 84/107 (79)    | 92.6 (35.3–99.6)                  | 1              | 73/308 (24)    | -                                 | 0.217    |
| Patients with neuroimaging/all patients                                             | 3                                              | 84/879 (10)    | 22.7 (3.2–72.3)                   | 7              | 1102/17094 (6) | 6.8 (3.8–11.7)                    | 0.027    |
| Patients with any neuroimaging findings/patients with neuroimaging                  | 2                                              | 43/57 (75)     | 76.0 (53.2–89.8)                  | 3              | 176/247 (71)   | 72.8 (56.8–84.5)                  | 0.793    |
| Patients with neuroimaging findings related to COVID-19*/patients with neuroimaging | 3                                              | 40/84 (48)     | 48.2 (23.0–74.4)                  | 5              | 174/666 (26)   | 29.8 (19.3–42.9)                  | 0.151    |
| Patients with neuroimaging findings related to COVID-19*/all patients               | 3                                              | 40/879 (5)     | 9.1 (1.4–42.0)                    | 4              | 138/9646 (1)   | 1.6 (0.7–3.6)                     | 0.029    |
| <b>Neuroimaging findings</b>                                                        |                                                |                |                                   |                |                |                                   |          |
| Olfactory bulb abnormality                                                          | 0                                              | -              | -                                 | 2              | 11/49 (22)     | 23.1 (12.9–37.7)                  | -        |
| White matter abnormality                                                            | 1                                              | 10/27 (37)     | -                                 | 5              | 69/438 (16)    | 14.8 (5.3–35.0)                   | 0.390    |
| Acute or subacute ischemic infarction                                               | 3                                              | 16/81 (20)     | 17.2 (4.6–47.3)                   | 7              | 114/908 (13)   | 15.1 (9.4–23.3)                   | 0.617    |
| Encephalopathy                                                                      | 3                                              | 25/84 (30)     | 22.2 (2.3–77.8)                   | 5              | 33/348 (9)     | 9.2 (3.0–24.7)                    | 0.323    |
| Cerebral microbleeds                                                                | 1                                              | 7/27 (26)      | -                                 | 7              | 100/956 (10)   | 10.7 (4.0–25.7)                   | 0.485    |
| Intracranial hemorrhage                                                             | 2                                              | 6/57 (11)      | 11.3 (5.1–23.0)                   | 3              | 41/709 (6)     | 7.0 (2.6–17.5)                    | 0.650    |
| Others                                                                              | 2                                              | 3/57 (5)       | 5.5 (1.8–15.6)                    | 3              | 35/415 (8)     | 8.9 (1.5–39.2)                    | 0.697    |
| Venous thrombosis                                                                   | 2                                              | 3/57 (5)       | 5.5 (1.8–15.6)                    | 0              | -              | -                                 | -        |
| PRES                                                                                | 0                                              | -              | -                                 | 2              | 5/351 (1)      | 1.6 (0.6–3.8)                     | -        |
| Grey matter abnormality                                                             | 1                                              | 10/27 (37)     | -                                 | 1              | 1/59 (2)       | -                                 | NA       |
| Cranial neuropathy other than olfactory nerves                                      | 0                                              | -              | -                                 | 3              | 6/371 (2)      | 2.7 (0.6–11.5)                    | -        |

\*Excluding neuroimaging findings not likely to be related to COVID-19, including cavernoma, chronic infarcts, known white matter lesions from multiple sclerosis, white matter lesions of small vessel disease, and microbleeds associated with chronic infarction. CI = confidence interval, COVID-19 = coronavirus disease 2019, NA = not available, PRES = posterior reversible encephalopathy syndrome
