# Supplementary material for: Neuroimaging Findings in Patients with COVID-19: A Systematic Review and Meta-Analysis
Source: PubMed Central journal article supplement — Korean J Radiol. 2021 Jul 1;22(11):1875–85. doi: 10.3348/kjr.2021.0127 (PMC8546134; doi:10.3348/kjr.2021.0127), 2021-07-01
Supplement: kjr-22-1875-s003.pdf [file kjr-22-1875-s003.pdf]

**Supplementary Table 3. Results of Subgroup Analysis Regarding Whether Only MRI Was Used as an Imaging Modality or Not**

| Outcomes                                                                            | Studies Using MRI Only |                |                                   | Studies Using CT and MRI |                |                                   | P       |
|-------------------------------------------------------------------------------------|------------------------|----------------|-----------------------------------|--------------------------|----------------|-----------------------------------|---------|
|                                                                                     | No. of Studies         | Proportion (%) | Meta-Analytic Proportion (95% CI) | No. of Studies           | Proportion (%) | Meta-Analytic Proportion (95% CI) |         |
| <b>Cohort-based outcomes</b>                                                        |                        |                |                                   |                          |                |                                   |         |
| Patients with neurologic symptoms/all patients                                      | 2                      | 358/1411 (25)  | 24.3 (19.9–29.4)                  | 2                        | 57/130 (44)    | 45.1 (26.9–64.7)                  | 0.004   |
| Patients with neuroimaging/patients with neurologic symptoms                        | 2                      | 100/358 (28)   | 37.1 (13.8–68.4)                  | 2                        | 57/57 (100)    | 98.3 (88.9–99.8)                  | < 0.001 |
| Patients with neuroimaging/all patients                                             | 4                      | 274/8876 (3)   | 3.4 (2.1–5.4)                     | 6                        | 912/9097 (10)  | 18.5 (11.0–29.3)                  | < 0.001 |
| Patients with any neuroimaging findings/patients with neuroimaging                  | 3                      | 176/247 (71)   | 72.8 (56.8–84.5)                  | 2                        | 43/57 (75)     | 76.0 (53.2–89.8)                  | 0.793   |
| Patients with neuroimaging findings related to COVID-19*/patients with neuroimaging | 4                      | 102/265 (38)   | 40.1 (28.0–53.6)                  | 4                        | 112/485 (23)   | 31.1 (16.6–50.6)                  | 0.397   |
| Patients with neuroimaging findings related to COVID-19*/all patients               | 3                      | 66/7700 (1)    | 0.9 (0.6–1.4)                     | 4                        | 112/2825 (4)   | 8.4 (2.8–22.2)                    | 0.002   |
| <b>Neuroimaging findings</b>                                                        |                        |                |                                   |                          |                |                                   |         |
| Olfactory bulb abnormality                                                          | 0                      | -              | -                                 | 2                        | 11/49 (22)     | 23.1 (12.9–37.7)                  | -       |
| White matter abnormality                                                            | 4                      | 50/274 (18)    | 17.0 (7.7–33.4)                   | 2                        | 29/191 (15)    | 19.4 (1.1–84.2)                   | 0.862   |
| Acute or subacute ischemic infarction                                               | 5                      | 59/250 (24)    | 24.4 (16.1–35.2)                  | 5                        | 71/739 (10)    | 11.0 (6.8–17.2)                   | 0.011   |
| Encephalopathy                                                                      | 3                      | 11/141 (8)     | 7.5 (2.3–21.7)                    | 5                        | 47/291 (16)    | 17.7 (4.3–50.8)                   | 0.383   |
| Cerebral microbleeds                                                                | 4                      | 42/274 (15)    | 14.5 (7.4–26.4)                   | 4                        | 65/709 (9)     | 10.7 (1.7–45.9)                   | 0.853   |
| Intracranial hemorrhage                                                             | 1                      | 4/27 (15)      | -                                 | 5                        | 43/739 (6)     | 6.9 (2.9–15.6)                    | 0.473   |
| Others                                                                              | 3                      | 33/164 (20)    | 15.4 (5.1–38.2)                   | 2                        | 5/308 (2)      | 2.6 (0.4–14.3)                    | 0.066   |
| Venous thrombosis                                                                   | 1                      | 2/30 (7)       | -                                 | 1                        | 1/27 (4)       | -                                 | NA      |
| PRES                                                                                | 1                      | 2/73 (3)       | -                                 | 1                        | 3/278 (1)      | -                                 | NA      |
| Grey matter abnormality                                                             | 2                      | 11/86 (13)     | 10.2 (0.4–78.2)                   | 0                        | -              | -                                 | -       |
| Cranial neuropathy other than olfactory nerves                                      | 1                      | 2/73 (3)       | -                                 | 2                        | 4/298 (1)      | 2.7 (0.2–29.0)                    | 0.999   |

\*Excluding neuroimaging findings not likely to be related to COVID-19, including cavernoma, chronic infarcts, known white matter lesions from multiple sclerosis, white matter lesions of small vessel disease, and microbleeds associated with chronic infarction. CI = confidence interval, COVID-19 = coronavirus disease 2019, NA = not available, PRES = posterior reversible encephalopathy syndrome
